# Supplementary material for: Lonicera Caerulea Juice Alleviates Alcoholic Liver Disease by Regulating Intestinal Flora and the FXR-FGF15 Signaling Pathway
Source: MDPI journal article supplement (doi:10.3390/nu15184025), 2023-09-17
Supplement: s1 [file s1]

Supplementary Table S1. Quantitative RT-PCR primer design.

| Target Gene    | Sequences (50–30)                                        | Reference |
|----------------|----------------------------------------------------------|-----------|
| Gapdh          | F: GTCCCGCCTGGAGAAACC<br>R: GGTGGAAGAGTGGGAGTTGC         | [1]       |
| $\beta$ -actin | F: TGTCCACCTTCCAGCAGATGT<br>R: AGCTCAGTAACAGTCCGCCTAGA   | [2]       |
| MUC2           | F: ACGTGTTCATATTTGCACCTCT<br>R: TCAACATTGAGAGTGCCAACT    | [3]       |
| MUC4           | F: TCTTTCTGTCTCAACTGTTGAATCAGA<br>R: CGTGGCCAGGATGTCAAAC | [4]       |
| ZO-1           | F: GCCGCTAAGAGCACAGCAA<br>R: TCCCCACTCTGAAAATGAGGA       | [5]       |
| Cldn1          | F: ACGGTCTTTGCACTTTGGTC<br>R: GGGAGAGGAGAAGCACAGTT       | [5]       |
| FGF15          | F: GGCAAGATATACGGGCTGAT<br>R: TCCATTTCCCTCCCTGAAGGT      | [6]       |
| FXR            | F: GGCAGAATCTGGATTGGAATCG<br>R: GCTGAACTTGAGGAAACGGG     | [7]       |
| FGFR4          | F: TTGGCCCTGTTGAGCATCTTT<br>R: GCCCTCTTTGTACCAGTGACG     | [8]       |
| CYP7A1         | F: GGGATTGCTGTGGTAGTGAGC<br>R: GGTATGGAATCAACCCGTTGTC    | [7]       |
| AMPK           | F: TGAAGATCGGCCACTACATC<br>R: TTGCCACCTTCACTTTCC         | [9]       |
| CPT1b          | F: CATGTATCGCCGAAACTGG<br>R: CCTGGGATGCGTGTAGTGTT        | [10]      |
| PPAR $\alpha$  | F: TGGGGATGAAGAGGGCTGAG<br>R: GGGGACTGCCGTTGTCTGT        | [11]      |

Supplementary Table S2. Phenolic components in LCJ.

| Assays                 | Content                     |
|------------------------|-----------------------------|
| Total phenol           | 18.00 $\pm$ 0.01 mg/mL      |
| Cyanidin-3-glucoside   | 394.57 $\pm$ 0.06 mg/100 mL |
| Cyanidin-3-galactoside | 275.48 $\pm$ 0.22 mg/100 mL |
| Chlorogenic            | 153.56 $\pm$ 0.17 mg/100 mL |
| Quercetin              | 96.44 $\pm$ 0.02 mg/100 mL  |
| Isochlorogenic acid C  | 16.77 $\pm$ 0.31 mg/100 mL  |
| Caffeic acid           | 15.18 $\pm$ 0.42 mg/100 mL  |
| Phlorizin              | 8.50 $\pm$ 0.33 mg/100 mL   |
| Catechin               | 7.92 $\pm$ 0.16 mg/100 mL   |
| Aromadendrin           | 1.97 $\pm$ 0.07 mg/100 mL   |
| Neodiosmin             | 1.13 $\pm$ 0.06 mg/100 mL   |
| Naringenin             | 0.96 $\pm$ 0.09 mg/100 mL   |
| Procyanidin B2         | 0.67 $\pm$ 0.05 mg/100 mL   |
| Epicatechin            | 0.37 $\pm$ 0.05 mg/100 mL   |
| Astragalin             | 0.27 $\pm$ 0.07 mg/100 mL   |
| 7-Hydroxycoumarin      | 0.17 $\pm$ 0.03 mg/100 mL   |
| Cynarin                | 0.07 $\pm$ 0.06 mg/100 mL   |

Supplementary Table S3. Comparison Table of English Abbreviations

| acronym       | Full Name                                                 |
|---------------|-----------------------------------------------------------|
| ALD           | Alcoholic liver damage                                    |
| LCJ           | <i>Lonicera caerulea</i> juice                            |
| LC            | <i>Lonicera caerulea</i>                                  |
| TG            | Triglyceride                                              |
| TC            | Total cholesterol                                         |
| CG            | Control group                                             |
| AG            | Alcohol group                                             |
| LG            | Low-dose LCJ group (total phenol intake: 150 mg/kg)       |
| HG            | High-dose LCJ group (total phenol intake: 300 mg/kg)      |
| SCG           | Small intestine in the control group                      |
| SAG           | Small intestine in the alcohol group                      |
| SHG           | Small intestine in the high-dose LCJ group                |
| LCG           | Large intestine in the control group                      |
| LAG           | Large intestine in the alcohol group                      |
| LHG           | Large intestine in the high-dose LCJ group                |
| DADA2         | Divisive amplicon denoising algorithm                     |
| SCFAs         | Short-chain fatty acids                                   |
| FXR           | Farnesoid X receptor                                      |
| FGF15         | Fibroblast growth factor 15                               |
| FGFR4         | Fibroblast growth factor receptor 4                       |
| CYP7A1        | Cholesterol 7 $\alpha$ -hydroxylase                       |
| CPT1b         | Recombinan Carnitine Palmitoyltransferase 1b              |
| LPS           | Lipopolysaccharide                                        |
| MUC2          | Mucin2                                                    |
| ZO-1          | Zona occludens 1                                          |
| AMPK          | Adenosine 5'-monophosphate (AMP)-activated protein kinase |
| PPAR $\alpha$ | Peroxisome proliferator-activated receptor                |
| MUC4          | Mucin4                                                    |
| TBA           | Total bile acid                                           |
| qPCR          | Quantitative Real-time PCR                                |
| HE            | Hematoxylin-eosin                                         |

|               |                                     |
|---------------|-------------------------------------|
| ALT           | Alanine aminotransferase            |
| AST           | Aspartate aminotransferase          |
| AB-PAS        | Eriodic acid Schiff and Alcian blue |
| WB            | Western blotting                    |
| T $\beta$ MCA | Tauro- $\beta$ -muricholic acid     |
| LCA           | Lithocholic acid                    |
| UDCA          | Ursodeoxycholic acid                |
| BSH           | Bile salt hydrolase                 |
| CDCA          | Chenodeoxycholic Acid               |
| DCA           | Deoxycholic acid                    |
| CA            | Cholic acid                         |
| TDCA          | Tauroursodeoxycholic acid           |
| TCA           | Taurocholate acid                   |
| GCDCA         | Glycochenodeoxycholic acid          |

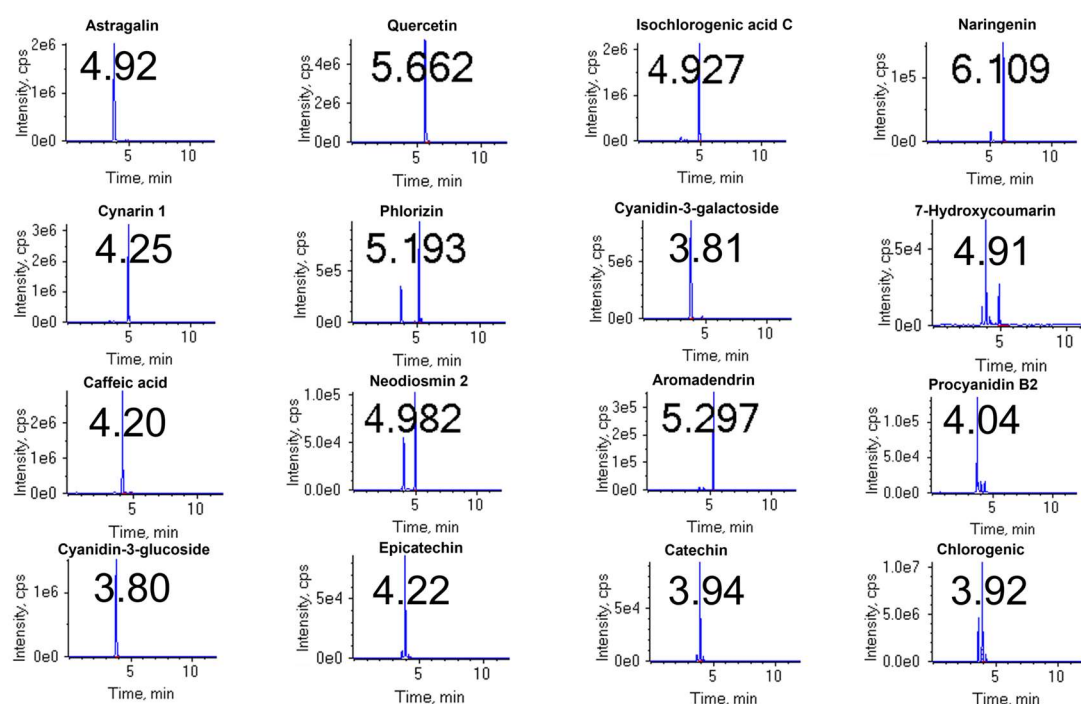

Supplementary Figure S1. Total chromatograms of 16 types of phenols in LCJ.

1. Li, C.; Yu, S.; Li, X.; Cao, Y.; Li, M.; Ji, G.; Zhang, L. Medicinal Formula Huazhi-Rougan Attenuates Non-Alcoholic Steatohepatitis Through Enhancing Fecal Bile Acid Excretion in Mice. *Front Pharmacol* **2022**, *13*, 833414, doi:10.3389/fphar.2022.833414.
2. Li, J.; Zhang, L.; Li, Y.; Wu, Y.; Wu, T.; Feng, H.; Xu, Z.; Liu, Y.; Ruan, Z.; Zhou, S. Puerarin improves intestinal barrier function through enhancing goblet cells and

- mucus barrier. *Journal of Functional Foods* **2020**, *75*, 104246, doi:<https://doi.org/10.1016/j.jff.2020.104246>.
3. Lu, F.; Li, Y.; Zhou, B.; Guo, Q.; Zhang, Y. Early-life supplementation of grape polyphenol extract promotes polyphenol absorption and modulates the intestinal microbiota in association with the increase in mRNA expression of the key intestinal barrier genes. *Food & Function* **2021**, *12*, 602-613, doi:10.1039/D0FO02231D.
  4. Wang, H.H.; Afdhal, N.H.; Gendler, S.J.; Wang, D.Q.H. Targeted disruption of the murine mucin gene 1 decreases susceptibility to cholesterol gallstone formation1. *Journal of Lipid Research* **2004**, *45*, 438-447, doi:<https://doi.org/10.1194/jlr.M300468-JLR200>.
  5. Jiang, S.; Xue, D.; Zhang, M.; Li, Q.; Liu, H.; Zhao, D.; Zhou, G.; Li, C. Myoglobin diet affected the colonic mucus layer and barrier by increasing the abundance of several beneficial gut bacteria. *Food Funct* **2022**, doi:10.1039/d2fo01799g.
  6. Danjo, T.; Eiraku, M.; Muguruma, K.; Watanabe, K.; Kawada, M.; Yanagawa, Y.; Rubenstein, J.L.; Sasai, Y. Subregional specification of embryonic stem cell-derived ventral telencephalic tissues by timed and combinatory treatment with extrinsic signals. *J Neurosci* **2011**, *31*, 1919-1933, doi:10.1523/jneurosci.5128-10.2011.
  7. Sun, C.C.; Zhang, C.Y.; Duan, J.X.; Guan, X.X.; Yang, H.H.; Jiang, H.L.; Hammock, B.D.; Hwang, S.H.; Zhou, Y.; Guan, C.X.; et al. PTUPB ameliorates high-fat diet-induced non-alcoholic fatty liver disease via inhibiting NLRP3 inflammasome activation in mice. *Biochem Biophys Res Commun* **2020**, *523*, 1020-1026, doi:10.1016/j.bbrc.2019.12.131.
  8. Zhao, Y.; Meng, C.; Wang, Y.; Huang, H.; Liu, W.; Zhang, J.-F.; Zhao, H.; Feng, B.; Leung, P.; Xia, Y. Interleukin (IL)-1 $\beta$  inhibits  $\beta$ -Klotho expression and FGF19 signaling in hepatocytes. *American journal of physiology. Endocrinology and metabolism* **2015**, *310*, aipendo.00356.02015, doi:10.1152/aipendo.00356.2015.
  9. Zhang, L.; Duan, Y.; Guo, Q.; Wang, W.; Li, F. A selectively suppressing amino acid transporter: Sodium-coupled neutral amino acid transporter 2 inhibits cell growth and mammalian target of rapamycin complex 1 pathway in skeletal muscle cells. *Anim Nutr* **2020**, *6*, 513-520, doi:10.1016/j.aninu.2020.03.010.
  10. Lee, J.; Narayan, V.P.; Hong, E.Y.; Whang, W.K.; Park, T. Artemisia Iwayomogi Extract Attenuates High-Fat Diet-Induced Hypertriglyceridemia in Mice: Potential Involvement of the Adiponectin-AMPK Pathway and Very Low Density Lipoprotein Assembly in the Liver. *Int J Mol Sci* **2017**, *18*, doi:10.3390/ijms18081762.
  11. Bak, E.J.; Kim, J.; Choi, Y.H.; Kim, J.H.; Lee, D.E.; Woo, G.H.; Cha, J.H.; Yoo, Y.J. Wogonin ameliorates hyperglycemia and dyslipidemia via PPAR $\alpha$  activation in db/db mice. *Clin Nutr* **2014**, *33*, 156-163, doi:10.1016/j.clnu.2013.03.013.
